# Supplementary material
Source: Research Square preprint supplement (doi:10.21203/rs.3.rs-10017791/v1)
Supplement: Supplementary file 2 [file e3f24b48c35605b7152f7ff6.docx]

**Table *1*** Baseline characteristics of respondents classified by prevention and control practices in the post-COVID-*19* pandemic period

| **Baseline characteristics** | **Number of respondents [N (%)]** | | | | **Total**  **(N=400)**  **[N (%)]** | | **p-value** |
| --- | --- | --- | --- | --- | --- | --- | --- |
| **Practices<80%*** **(n=293)** | | **Practices≥80%*** **(n=107)** | |
| **Gender**   - Male - Female | 105 (35.8)  188 (64.2) | | 22 (20.6)  85 (79.4) | | 127 (31.8)  273 (68.3) | | **0.004a** |
| **Age (years) (N=395)**   - ≤30 - 31-45 - 46-60 - ≥61 - Mean ± SD. - Median (IQR) - Min-max | 66 (22.8)  79 (27.3)  104 (36.0)  40 (13.8)  43.93±14.46  45 (55-32)  18-90 | | 28 (26.4)  31 (29.2)  32 (30.2)  15 (14.2)  43.27±14.74  40.5 (54-29.7)  20-78 | | 94 (23.8)  110 (27.8)  136 (34.4)  55 (13.9)  43.76±14.52  45 (55-32)  18-90 | | 0.734a  0.689c  0.526d |
| **Highest education level**   - Primary school - Junior high school - Senior high school - Diploma/Certificate - Bachelor’s degree or higher | 86 (29.4)  39 (13.3)  55 (18.8)  41 (14.0)  72 (24.6) | | 22 (20.6)  11 (10.3)  14 (13.1)  19 (17.8)  41 (38.3) | | 108 (27.0)  50 (12.5)  69 (17.3)  60 (15.0)  113 (28.3) | | **0.036a** |
| **Occupation**   - None - Farmer - Private company employee - Business owner - General laborer - Government employee | 50 (17.1)  76 (25.9)  24 (8.2)  42 (14.3)  55 (18.8)  46 (15.7) | | 18 (16.8)  21 (19.6)  9 (8.4)  9 (8.4)  19 (17.8)  31 (29.1) | | 68 (17.0)  97 (24.3)  33 (8.3)  51 (12.8)  74 (18.5)  77 (19.3) | | 0.058a |
| **Underlying Diseases**   - No - Yes** | 165 (56.3)  128 (43.7) | | 65 (60.7)  42 (39.3) | | 230 (57.5)  170 (42.5) | | 0.427a |
| **Number of current medications (N=393)**   - Not using medication - 1-2 items - ≥3 items - Mean ± SD. - Median (IQR) - Min-max | 168 (58.1)  46 (15.9)  75 (26.0)  1.64±2.74  0 (0-3)  0-18 | | 65 (62.5)  15 (14.4)  24 (23.1)  1.34±2.36  0 (0-2)  0-12 | | 233 (59.3)  61 (15.5)  99 (25.2)  1.56±2.65  0 (0-2)  0-18 | | 0.738a  0.333c  0.325d |
| **History of drug allergies**   - No - Yes | 284 (96.9)  9 (3.1) | | 104 (97.2)  3 (2.8) | | 388 (97.0)  12 (3.0) | | 1.000b |
| **Timing of COVID-19 infection**   - During the pandemic - Post-pandemic - Both periods | | 172 (58.7)  98 (33.4)  23 (7.8) | | 68 (63.6)  22 (20.6)  17 (15.9) | | 240 (60.0)  120 (30.0)  40 (10.0) | **0.008a** |
| **Number of COVID-19 infections**   - 1 time - ≥2 times - Mean ± SD. - Median (IQR) - Min-max | | 253 (86.3)  40 (13.7)  1.15±0.39  1 (1-1)  1-3 | | 83 (77.6)  24 (22.4)  1.24±0.47  1 (1-1)  1-3 | | 336 (84.0)  64 (16.0)  1.18±0.42  1 (1-1)  1-3 | **0.034a**  0.072c  **0.036d** |
| **Abnormal symptoms persisting after recovery (Long COVID)**   - No - Yes | | 146 (49.8)  147 (50.2) | | 55 (51.4)  52 (48.6) | | 201 (50.3)  199 (49.8) | 0.781a |
| **COVID-19 Vaccination History**   - Never vaccinated - 1-2 doses - ≥3 doses - Mean ± SD. - Median (IQR) - Min-max | | 6 (2.0)  135 (46.1)  152 (51.9)  2.61±0.88  3 (2-3)  0-5 | | 0 (0.0)  42 (39.3)  65 (60.7)  2.76±0.75  3 (2-3)  2-6 | | 6 (1.5)  177 (44.3)  217 (54.3)  2.65±0.85  3 (2-3)  0-6 | 0.110c  0.174d |
| **Name of COVID-19 vaccine received**   - Sinovac - Sinopharm - Pfizer - Moderna - AstraZeneca | | 196 (66.9)  18 (6.1)  149 (50.9)  22 (7.5)  178 (60.8) | | 79 (73.8)  8 (7.5)  57 (53.3)  5 (4.7)  67 (62.6) | | 275 (68.8)  26 (6.5)  206 (51.5)  27 (6.8)  245 (61.3) | 0.185a  0.632a  0.668a  0.317a  0.735a |
| **Name of anti-COVID drug received**   - None - Andrographis - Favipiravir - Molnupiravir - Nirmatrelvir/ritonavir | | 16 (5.5)  168 (57.3)  69 (23.5)  80 (27.3)  3 (1.0) | | 3 (2.8)  75 (70.1)  25 (23.4)  13 (12.1)  8 (7.5) | | 19 (4.8)  243 (60.8)  94 (23.5)  93 (23.3)  11 (2.8) | 0.269a  0.021a  0.969a  **0.001**a  **0.002**b |
| **Report adverse events related to COVID-19 vaccines.**   - No - Yes | | 217 (74.1)  76 (25.9) | | 73 (68.2)  34 (31.8) | | 290 (72.5)  110 (27.5) | 0.247a |
| **Report adverse effects related to anti-COVID drugs**   - No - Yes | | 284 (96.9)  9 (3.1) | | 97 (90.7)  10 (9.3) | | 381 (95.3)  19 (4.8) | **0.009**a |
| **Self-medication with herbs or dietary supplements during the COVID-19 pandemic**   - No - Yes*** | | 173 (59.0)  120 (41.0) | | 54 (50.5)  53 (49.5) | | 227 (56.8)  173 (43.3) | 0.125a |

a Pearson Chi- square test; b Fisher's Exact Test, c independent t-test, d Mann Whitney U test.

Bold numbers of p-value indicate statistical significance at p<0.05.

*The total practices score ranges from 0 to 6 and a score with a cut-off score ≥5 was considered as having high

practices level (practices ≥ 80%), while score < 5 was considered as a practice level of less than 80% (practices < 80%).

** Underlying diseases included diabetes (n=86), hypertension (n=81), hyperlipidemia (n=47), bone and joint diseases (n=14), Chronic Kidney Disease (CKD) (n=10), thyroid disorder (n=9), Cardiovascular Disease (CVD) (n=8), Asthma and Chronic Obstructive Pulmonary Disease (COPD) (n=7), Gastrointestinal (GI) disease (n=3), breast cancer (n=2), Systemic Lupus Erythematosus (SLE) (n=2), anemia (n=2), nephrotic syndrome (n=1), Major Depressive Disorder (MDD) (n=1), and Human Immunodeficiency Virus (HIV) (n=1)

***Medications procured during the COVID-19 pandemic included antipyretics (n=125), antitussives/expectorants (n=105), sore throat medicine (n=84), antihistamines/decongestants (n=69), effervescent mucolytics (n=33), analgesics/anti-inflammatory drugs (n=25), antibiotics (n=11), antiflatulents (n=10), antiemetics (n=9), and sedatives/hypnotics (n=1). Herbal medicinal products and dietary supplements used include Andrographis (n=157), ginger (n=53), Indian gooseberry (n=43), vitamin C (n=35), fingerroot (n=23), turmeric (n=20), shallots (n=18), multivitamins (n=12), Others including galangal, lemongrass, kaffir lime leaves, Laurel Clock Vine, Ya Ha Rak formula, and lime juice (n=8), Zinc (n=6), Ginseng (n=4), Vitamin A (n=2)

**Table *2*** Prevention and control practices during and after the COVID-*19* pandemic

| **Practices** | **During Pandemic** | | **Post-Pandemic** | | **p-value a** |
| --- | --- | --- | --- | --- | --- |
| **Always** | **Sometimes or never** | **Always** | **Sometimes or never** |
| 1. Frequent hand washing with soap and water or use of alcohol gel. | 328 (82.0) | 72 (18.0) | 173 (43.3) | 227 (56.8) | **<0.001** |
| 2. Maintaining appropriate social distancing when going to crowded places | 294 (73.5) | 106 (26.5) | 130 (32.5) | 270 (67.5) | **<0.001** |
| 3. Wearing face masks when going to crowded places. | 340 (85.0)3 | 60 (15.0) | 177 (44.3) | 223 (55.8) | **<0.001** |
| 4. Self-monitoring of symptoms for at least 5 days following contact with a COVID-19 infected person. | 336 (84.0) | 64 (16.0) | 195 (48.8)3 | 205 (51.3) | **<0.001** |
| 5. Self-isolating when suspected COVID-19 infection. | 359 (89.8)1 | 41 (10.3) | 232 (58.0)1 | 168 (42.0) | **<0.001** |
| 6. Using an Antigen Test Kit (ATK) test when suspecting COVID-19 infection. | 354 (88.5)2 | 46 (11.5) | 229 (57.3)2 | 171 (42.8) | **<0.001** |

a Mcnemar Chi-square test; Bold numbers of p-value indicate statistical significance at p<0.05.; 1-3 indicates the top 3 most frequently reported responses.

**Table *3*** Patient-reported SAEs of COVID-19 vaccines and anti-COVID drugs.

| **Patient-reported SAEs** | **Number of patients  [N (%)] (N=400)** | ****Proportion of Total Reports** S**AEs   [N (%)]** | **Incidence rate of SAEs (%)** | *****Total no. of symptoms**  **reported** | **No. of symptoms reported (No. of patients with reported SAEs, %)** |
| --- | --- | --- | --- | --- | --- |
| **Vaccine Manufacturer (N=110)** | | | | | |
| **Sinovac** | 275 (68.8) | 41 (37.3) | 14.9 | 65 | *Fever (n=20,48.8%), fatigue (n=14,34.1%), *pain at injection site (n=8,19.5%), *headache (n=7,17.1%), *dizziness (n=3,7.3%), *weak limbs (n=3,7.3%), *cough (n=2,4.9%), numbness of the hands and feet (n=1,0.9%), feeling numb on half of the face (n=1,2.4%), *rash (n=1,2.4%), *itching (n=1,2.4%), alopecia (n=1,2.4%), *myalgia (n=1,2.4%), asthma (n=1,2.4%), *menstrual irregularities (n=1,2.4%) |
| **Sinopharm** | 26 (6.5) | 4 (3.6) | 15.4 | 8 | *Fever (n=3,75.0%), *fatigue(n=2,50.0%), *pain at injection site (n=1,25.0%), *headache (n=1,25.0%), *nausea/vomiting (n=1,25.0%) |
| **AstraZeneca** | 245 (61.3) | 56 (50.9) | 22.9 | 98 | *fever (n=40,71.4%), *fatigue (n=17,30.4%), *headache(n=9,16.1%), *chills (n=8,14.3%), *pain at injection site (n=7,12.5%), *myalgia (n=5,8.9%), *dyspnea (n=3,5.4%), alopecia (n=2,3.6%), *palpitation (n=2,3.6%), *dizziness (n=1,1.8%), *drowsiness (n=1,1.8%), *nausea/vomiting (n=1,1.89%), *chest pain (n=1,1.8%), cough (n=1,1.8%) |
| **Pfizer** | 206 (51.5) | 44 (40.0) | 21.4 | 83 | *Fever (n=27,61.4%), *fatigue (n=14,31.8%), *pain at injection site (n=12,27.3%), *headache (n=4,9.1%), *chills (n=4,9.1%), *myalgia(n=4,9.1%), loss of memory (n=3,6.8%), *swelling/ Erythema at injection site (n=2,4.5%), *rash (n=2,4.5%), *dyspnea (n=2,4.5%), *dizziness (n=1,2.3%), excessive sweating (n=1,2.3%), *abdominal pain (n=1,2.3%), *diarrhea (n=1,2.3%) *palpitation (n=1,2.3%), *hypotension (n=1,2.3%), cough (n=1,2.3%), asthma (n=1,2.3%) |
| **Moderna** | 27 (6.8) | 5 (4.5) | 18.5 | 6 | *Fever (n=3,60.0%), *Fatigue (n=2,40.0%), *pain at injection site (n=1,20.0%) |
| **anti-COVID drugs (N=19)** | | | | | |
| **Andrographis (***Andrographis paniculata***)** | 243 (60.8) | 9 (47.4) | 3.7 | 48 | *Dizziness (n=4,44.4%), *Nausea/vomiting (n=3,33.3%),*itching (n=3, 33.3%), *diarrhea (n=3, 33.3%), *rash (n=2,22.2%), *abnormal taste/decreased taste (n=2, 22.2%), *pale skin (n=2, 22.2%), *ataxia (n=2, 22.2%), *decreased hearing (n=2, 22.2%), *Palpitations (n=2, 22.2%), *Blurred vision (n=2, 22.2%), *Muscle pain (n=2, 22.2%), *Fatigue (n=2, 22.2%), *Red skin (n=1,11.1%), *Urticaria (n=1, 11.1%), Tight cork under the right rib cage (n=1, 11.1%), Irregular urination (n=1, 11.1%), *Tinnitus (n=1, 11.1%), *Ringing in the ears (n=1, 11.1%), *Headache (n=1, 11.1%), *Eye pain (n=1, 11.1%), *itching/irritation or inflammation of the eyes (n=1, 11.1%), Yellow eyes (n=1, 11.1%), *Joint or bone pain (n=1, 11.1%), *extreme thirst (n=1, 11.1%). |
| **Favipiravir** | 94 (23.5) | 8 (42.1) | 8.5 | 38 | *Palpitations (n=4,50.0%), *dizziness (n=3,37.5%), *Blurred vision (n=3,37.5%), *Fatigue (n=2,25.0%), *rash (n=2, 25.0%), *abnormal taste/decreased taste (n=2, 25.0%), *hoarseness (n=2, 25.0%), *nausea/vomiting (n=2, 25.0%), *loss of appetite (n=2, 25.0%), *itching (n=1,12.5%), *Mouth pain (n=1, 12.5%), *Sore throat (n=1, 12.5%), *Abdominal pain (n=1, 12.5%), *bloating (n=1, 12.5%) , Tightness under the right rib cage (n=1, 12.5%) Decreased hearing (n=1, 12.5%), *Headache (n=1, 12.5%), *Arrhythmia (n=1, 12.5%), *Low blood pressure (n=1, 12.5%), *Shortness of breath/ dyspnea (n=1, 12.5%), *Muscle pain (n=1, 12.5%), *Joint or bone pain (n=1, 12.5%), Increased sweating (n=1, 12.5%), eye color changes to blue (n=1, 12.5%). |
| **Molnupiravir** | 93 (23.3) | 2 (0.5) | 2.2 | 3 | *nausea/vomiting (n=1,50.0%), *rash (n=1,50.0%), *itching (n=1,50.0%) |

* Known ADRs

** Number of patients with SAEs from COVID-19 vaccine and anti-COVID drugs, N=110 and N=19 respectively.

*** Total no. of symptoms reported from COVID-19 vaccine and anti-COVID drugs, N=260 and N=89 respectively

**Table 4** Factors related to patient reported SAEs of COVID-19 vaccines or anti-COVID drugs (univariate analysis)

| **Factors** | **Number of respondents [N (%)]** | | **Total**  **[N (%)]**  **(N=400)** | **p-value** |
| --- | --- | --- | --- | --- |
| **No reported SAEs**  **(N=284)** | **Reported SAEs (N=116)** |
| **Gender**   - Male - Female | 100 (35.2)  184 (64.8) | 27 (23.3)  89 (76.7) | 127 (31.8)  273 (68.3) | **0.020a** |
| **Age (years) (N=395)**   - ≤30 - 31-45 - 46-60 - ≥61 | 60 (21.4)  76 (27.1)  100 (35.7)  44 (15.7) | 34 (29.6)  34 (29.6)  36 (31.3)  11 (9.6) | 94 (23.8)  110 (27.8)  136 (34.4)  55 (13.9) | 0.164a |
| **Highest education level**   - Primary school - Junior high school - Senior high school - Diploma/Certificate - Bachelor’s degree or higher | 89 (31.3)  33 (11.6)  47 (16.5)  39 (13.7)  76 (26.8) | 19 (16.4)  17 (14.7)  22 (19.0)  21 (18.1)  37 (31.9) | 108 (27.0)  50 (12.5)  69 (17.3)  60 (15.0)  113 (28.2) | **0.049a** |
| **Occupation**   - None - Farmer - Private company employee - Business owner - General laborer - Government employee | 53 (18.7)  76 (26.8)  19 (6.7)  27 (9.5)  56 (19.7)  53 (18.7) | 15 (12.9)  21 (18.1)  14 (12.1)  24 (20.7)  18 (15.5)  24 (20.7) | 68 (17.0)  97 (24.3)  33 (8.3)  51 (12.8)  74 (18.5)  77 (19.3) | **0.007a** |
| **Underlying diseases**   - No - Yes* | 164 (57.7)  120 (42.3) | 66 (56.9)  50 (43.1) | 230 (57.5)  170 (42.5) | 0.876a |
| **Number of current medications (N=393)**   - Not using medication - 1-2 items - ≥3 items | 167 (59.4)  40 (14.2)  74 (26.3) | 66 (58.9)  21 (18.8)  25 (22.3) | 233 (59.3)  61 (15.5)  99 (25.2) | 0.457a |
| **History of drug allergies**   - No - Yes | 276 (97.2)  8 (2.8) | 112 (96.6)  4 (3.4) | 388 (97.0)  12 (3.0) | 0.751b |
| **Timing of COVID-19 infection**   - During the pandemic - Post-pandemic - Both periods | 174 (59.9)  90 (31.7)  24 (8.5) | 70 (60.3)  30 (25.9)  16 (13.8) | 240 (60.0)  120 (30.0)  40 (10.0) | 0.193a |
| **Number of COVID-19 infections**   - 1 time - ≥2 times | 242 (85.2)  42 (14.8) | 94 (81.0)  22 (19.0) | 336 (84.0)  64 (16.0) | 0.301a |
| **COVID-19 vaccination history**   - 0-1 doses - ≥2 doses | 11 (3.9)  273 (96.1) | 3 (2.6)  113 (97.4) | 14 (3.5)  386 (96.5) | 0.765b |
| **Type of prior COVID-19 Vaccine**   - Inactivated Vaccine (Sinovac/Sinopharm) - mRNA Vaccine (Pfizer/ Moderna) - Viral Vector Vaccine (AstraZeneca) | 202 (71.1)  149 (52.5)  173 (60.9) | 82 (70.7)  70 (60.3)  72 (62.1) | 284 (71.0)  219 (54.8)  245 (61.3) | 0.930a  0.150a  0.830a |
| **Previous COVID-19 antiviral therapy**   - None - Andrographis - Favipiravir/Molnupiravir/ Nirmatrelvir/ritonavir (antiviral user) | 11 (3.9)  163 (57.4)  145 (51.1) | 8 (6.9)  80 (69.0)  49 (42.2) | 19 (4.8)  243 (60.8)  194 (48.5) | 0.197a  **0.032a**  0.109a |
| **Self-medication with herbs or dietary supplements during the COVID-19 pandemic**   - No - Yes** | 177 (62.3)  107 (37.7) | 50 (43.1)  66 (56.9) | 227 (56.8)  173 (43.3) | **<0.001a** |

a Pearson Chi- square test; b Fisher's Exact Test

*Underlying diseases included diabetes (n=86), hypertension (n=81), hyperlipidemia (n=47), bone and joint diseases (n=14), Chronic Kidney Disease (CKD) (n=10), thyroid disorder (n=9), Cardiovascular Disease (CVD) (n=8), Asthma and Chronic Obstructive Pulmonary Disease (COPD) (n=7), Gastrointestinal (GI) disease (n=3), breast cancer (n=2), Systemic Lupus Erythematosus (SLE) (n=2), anemia (n=2), nephrotic syndrome (n=1), Major Depressive Disorder (MDD) (n=1), and Human Immunodeficiency Virus (HIV) (n=1)

**Medications procured during the COVID-19 pandemic included antipyretics (n=125), antitussives/expectorants (n=105), sore throat medicine (n=84), antihistamines/decongestants (n=69), effervescent mucolytics (n=33), analgesics/anti-inflammatory drugs (n=25), antibiotics (n=11), antiflatulents (n=10), antiemetics (n=9), and sedatives/hypnotics (n=1). Herbal medicinal products and dietary supplements used include Andrographis (n=157), ginger (n=53), Indian gooseberry (n=43), vitamin C (n=35), fingerroot (n=23), turmeric (n=20), shallots (n=18), multivitamins (n=12), Others including galangal, lemongrass, kaffir lime leaves, Laurel Clock Vine, Ya Ha Rak formula, and lime juice (n=8), Zinc (n=6), Ginseng (n=4), Vitamin A (n=2)

**Table *5***Factors associated with patient-reported SAEs of COVID-19 vaccines or anti-COVID drugs (multiple logistic regression analysis)

| **Factors** | **Number of respondents [N (%)]** | | **Adjusted**  **OR**  **(aOR)** | **95% CI** | | **p-value** |
| --- | --- | --- | --- | --- | --- | --- |
| **No Reported SAEs**  **(N=284)** | **Reported SAEs**  **(N=116)** | **Lower** | **Upper** |
| **Gender**   - Male - Female | 100 (35.2)  184 (64.8) | 27 (23.3)  89 (76.7) | 1  1.712 | 0.984 | 2.975 | 0.057 |
| **Age (years) (N=395)**   - ≤30 - 31-45 - 46-60 - ≥61 | 60 (21.4)  76 (27.1)  100 (35.7)  44 (15.7) | 34 (29.6)  34 (29.6)  36 (31.3)  11 (9.6) | 1  0.899  0.830  0.794 | 0.456  0.396  0.299 | 1.773  1.739  2.107 | 0.759  0.622  0.643 |
| **Highest education level**   - Primary school - Junior high school - Senior high school - Diploma/Certificate - Bachelor’s degree or higher | 89 (31.3)  33 (11.6)  47 (16.5)  39 (13.7)  76 (26.8) | 19 (16.4)  17 (14.7)  22 (19.0)  21 (18.1)  37 (31.9) | 1  1.867  1.664  1.441  1.161 | 0.791  0.726  0.570  0.459 | 4.407  3.812  3.638  2.939 | 0.154  0.229  0.440  0.753 |
| **Occupation**   - None - Farmers - Private company employees - Business owner - General laborer - Government employee | 53 (18.7)  76 (26.8)  19 (6.7)  27 (9.5)  56 (19.7)  53 (18.7) | 15 (12.9)  21 (18.1)  14 (12.1)  24 (20.7)  18 (15.5)  24 (20.7) | 1  0.955  2.126  2.482  0.855  1725 | 0.390  0.762  0.999  0.345  0.633 | 2.338  5.934  6.164  2.114  4.698 | 0.921  0.105  0.050  0.734  0.286 |
| **Timing of COVID-19 infection**   - During the pandemic - Post-pandemic - Both periods | 174 (59.9)  90 (31.7)  24 (8.5) | 70 (60.3)  30 (25.9)  16 (13.8) | 1  0.816  1.553 | 0.467  0.723 | 1.428  3.338 | 0.477  0.259 |
| **mRNA COVID vaccine recipients**   - No - Yes | 135 (47.5)  149 (52.5) | 46 (39.7)  70 (60.3) | 1  1.224 | 0.739 | 2.027 | 0.432 |
| **No history of COVID-19 antiviral use**   - No - Yes | 273 (96.1)  11 (3.9) | 108 (93.1)  8 (6.9) | 1  2.921 | 0.805 | 10.601 | 0.103 |
| **Andrographis users**   - No - Yes | 121 (42.6)  163 (57.4) | 36 (31.0)  80 (69.0) | 1  1.654 | 0.776 | 3.523 | 0.192 |
| **Standard chemical antivirals users** (**Favipiravir/Molnupiravir/ Nirmatrelvir/ritonavir**)   - No - Yes | 139 (48.9)  145 (51.1) | 67 (57.8)  49 (42.2) | 1  1.263 | 0.634 | 2.514 | 0.507 |
| **Self-medication with herbs or dietary supplements during the COVID-19 pandemic**   - No - Yes* | 177 (62.3)  107 (37.7) | 50 (43.1)  66 (56.9) | 1  2.206 | 1.317 | 3.696 | **0.003** |

Variables included in the multiple logistic regression analysis are gender, age, highest education level, occupation, timing of COVID-19 infection, mRNA COVID vaccine recipients, previous COVID-19 antiviral therapy, and self-medication with herbs or dietary supplements during the COVID-19 pandemic.

Bold numbers of p-value indicate statistical significance at p<0.05.

*Medications procured during the COVID-19 pandemic included antipyretics (n=125), antitussives/expectorants (n=105), sore throat medicine (n=84), antihistamines/decongestants (n=69), effervescent mucolytics (n=33), analgesics/anti-inflammatory drugs (n=25), antibiotics (n=11), antiflatulents (n=10), antiemetics (n=9), and sedatives/hypnotics (n=1). Herbal medicinal products and dietary supplements used include Andrographis (n=157), ginger (n=53), Indian gooseberry (n=43), vitamin C (n=35), fingerroot (n=23), turmeric (n=20), shallots (n=18), multivitamins (n=12), Others including galangal, lemongrass, kaffir lime leaves, Laurel Clock Vine, Ya Ha Rak formula, and lime juice (n=8), Zinc (n=6), Ginseng (n=4), Vitamin A (n=2)

**Table 6** Problems and barriers regarding COVID-19 prevention and treatment among patients during and after the pandemic

| Problems and Barriers (N=400) | During Pandemic  [N (%)] | Post-Pandemic  [N (%)] | p-value a |
| --- | --- | --- | --- |
| 1. Problems regarding the reliability of information sources: | | | |
| - Information regarding COVID-19 disease. | 224 (56.0)3 | 159 (39.8) | **<0.001** |
| - Information regarding drugs/supplements for COVID-19 prevention. | 161 (40.3) | 166 (41.5) | 0.712 |
| - Information regarding guidelines for COVID-19 prevention. | 177 (44.3) | 145 (36.3) | **0.005** |
| - Information regarding COVID-19 vaccines. | 178 (44.5) | 154 (38.5) | 0.05 |
| - Information regarding COVID-19 booster vaccines. | 125 (31.3) | 125 (31.3) | 1.000 |
| - Information regarding COVID-19 therapeutic drugs. | 124 (31.0) | 121 (30.3) | 0.857 |
| 2. Problems regarding COVID-19 vaccines: | | | |
| - Lack of access to COVID-19 vaccines. | 111 (27.8) | 91 (22.8) | **0.049** |
| - Concerns regarding vaccine efficacy. | 236 (59.1)2 | 209 (52.4)2 | **0.014** |
| - Concerns regarding vaccine safety. | 244 (61.0)1 | 211 (52.8)1 | **0.002** |
| - Delayed access to vaccines. | 126 (31.5) | 94 (23.5) | **0.002** |
| - Cost incurred to access vaccines. | 65 (16.3) | 50 (12.5) | 0.053 |
| - Lack of confidence in the manufacturing company. | 97 (24.3) | 81 (20.3) | 0.093 |
| - Inconvenience of receiving multiple booster doses. | 67 (16.8) | 96 (24.0) | **0.001** |
| 3. Problems regarding anti-COVID drug: | | | |
| - Lack of access to anti-COVID drugs. | 138 (34.5) | 113 (28.3) | **0.019** |
| - Cost incurred to access anti-COVID drugs. | 96 (24.0) | 99 (24.8) | 0.807 |
| - Insufficiency of anti-COVID drugs. | 189 (47.3) | 151 (37.8) | **<0.001** |
| - Delayed access to anti-COVID drugs. | 169 (42.3) | 143 (35.8) | **0.019** |
| 4. Insufficient COVID-19 screening and surveillance systems. | 164 (41.2) | 122 (30.7) | **<0.001** |
| 5. Lack of surveillance and follow-up systems for patients with Long COVID. | 168 (42.0) | 168 (42.0)3 | 1.000 |

a Mcnemar Chi-square test
Bold numbers of p-value indicate statistical significance at p<0.05. 1-3 indicates the top 3 most frequently reported item
